# Supplementary material for: Tremella-like graphene–Au composites used for amperometric determination of dopamine
Source: Royal Society of Chemistry journal article supplement (doi:10.1039/c5an00019j), 2015-01-01
Supplement: c5an00019j1.pdf [file c5an00019j1.pdf]

## Supplementary Materials

### Tremella-like graphene –Au composites used for amperometric determination of dopamine

#### Preparation of layer-stacking GN-Au composites

Briefly, 2 mL of 0.5 mmol/L  $\text{HAuCl}_4$  water solution was added dropwise into the 5 mL 1 mg/mL GO solution. Subsequently,  $\text{NH}_3\text{H}_2\text{O}$  was added to adjust the pH of the mixture to 10. Then  $\text{NaBH}_4$  solution was added dropwise to reduce both  $\text{Au}^{3+}$  and GO under vigorous stirring. The mixture was filtered, and the RGO-Au composites was washed with doubly distilled water and dried at 50 °C.

**Fig. S1**

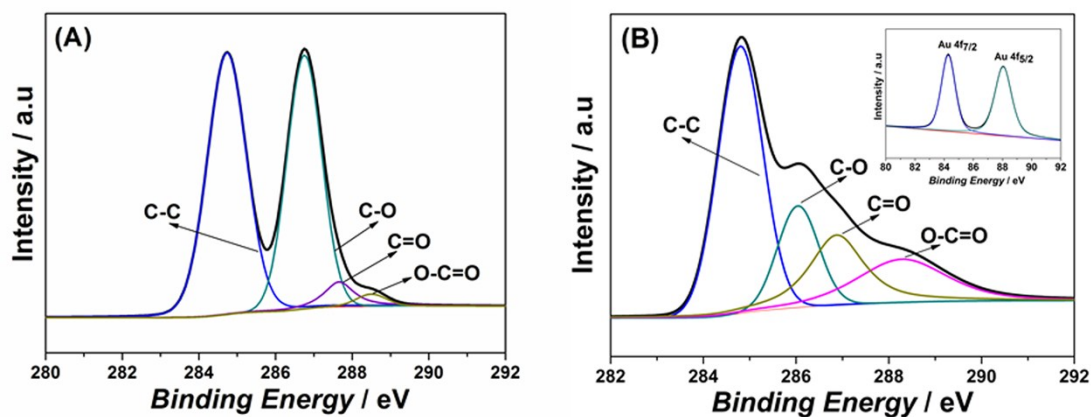

**Fig. S1** (A) XPS C 1s spectra of GO. (B) XPS C 1s spectra of t-GN-Au. Insert: XPS Au 4f spectra of t-GN-Au.

**Fig. S2**

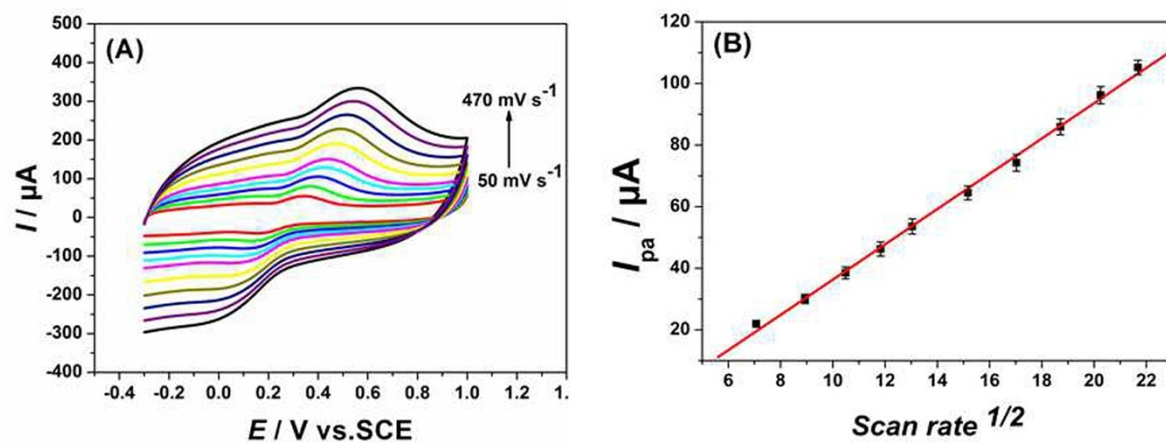

**Fig. S2** (A) Cyclic voltammograms of 300  $\mu\text{M}$  DA at the t-GN-Au modified GCE in BR buffer solution with different scan rate (50, 80, 110, 140, 170, 200, 230, 260, 290, 320, 350, 380, 410, 440, and  $470 \text{ mV s}^{-1}$ ). (B) Plot of anodic peak current *versus* square root of scan rates (error bars show SD of three measurements).

**Fig. S3**

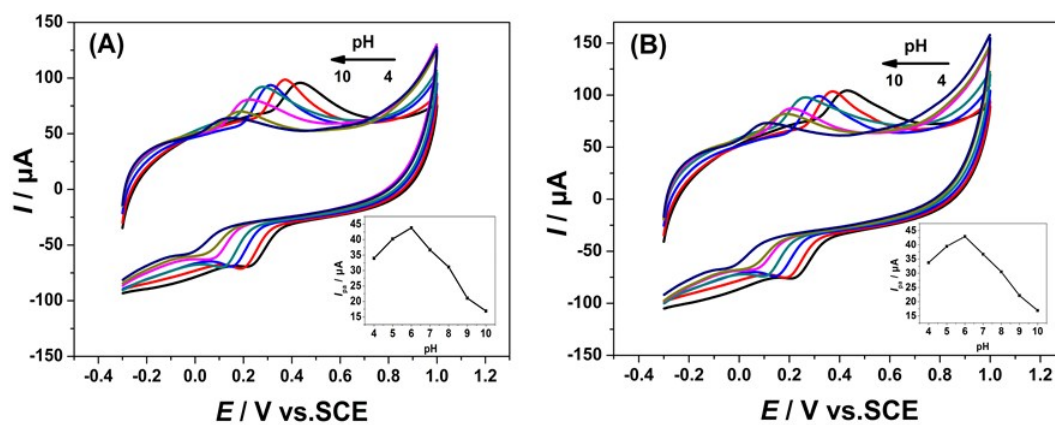

**Fig. S3** Cyclic voltammograms of 300  $\mu$ M DA at the t-GN-Au modified GCE in a mixture of BR buffer solution and serum samples (A) or a mixture of BR buffer solution and urine samples (B) with different pH values (4.0-10.0). Scan rate: 100  $\text{mV s}^{-1}$ . Insert: Plot of anodic peak current for DA *versus* pH values.
